# Supplementary material
Source: PubMed Central journal article supplement (PMC4091154)
Supplement: auto-10-677-s01.pdf [file auto-10-677-s01.pdf]

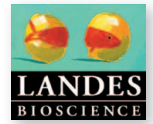

## **Supplemental Material to:**

**Samjhana Thapaliya, Ashok Runkana, Megan R McMullen,  
Laura E Nagy, Christine McDonald,  
Sathyamangla V Naga Prasad, and Srinivasan Dasarathy**

**Alcohol-induced autophagy contributes to loss in skeletal  
muscle mass**

**Autophagy 2014; 10(4)**

**<http://dx.doi.org/10.4161/auto.27918>**

**[www.landesbioscience.com/journals/autophagy/article/27918](http://www.landesbioscience.com/journals/autophagy/article/27918)**

Control

100 mM ETOH

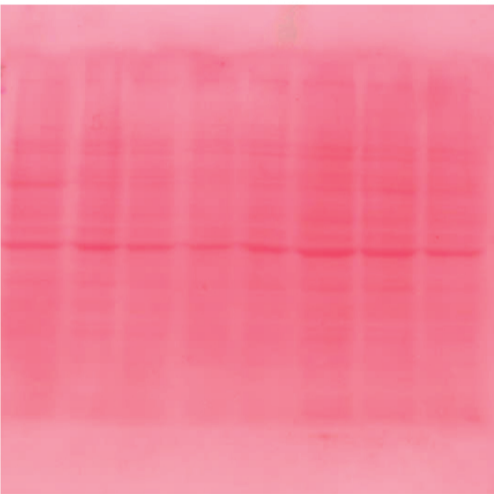

Ponceau  
stain

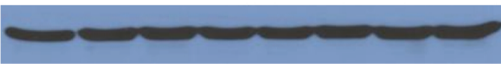

ACTB

- 1 **Figure S1.** Ponceau stain of membrane after electrotransfer, showing equal loading of protein.
- 2 Immunoblot of ACTB showed no alteration in expression with ethanol treatment.
